# Supplementary material for: Direct ultrasonic modification of a current collector with enhanced pseudocapacity
Source: Royal Society of Chemistry journal article supplement (doi:10.1039/c6ra11453a), 2016-01-01
Supplement: c6ra11453a1.pdf [file c6ra11453a1.pdf]

## Supplementary Information

### Directly ultrasonic modification of current collector with enhanced pseudocapacity

Zijun Shi, Qingwen Zhou, Yang Liu, Yanfang Gao\* and Jinrong Liu

College of Chemical Engineering, Inner Mongolia University of Technology, Hohhot,  
010051, P. R. China.

Corresponding author. Tel.: +86 471 6575722; Fax: +86 471 6503298.

*E-mail address:* [yf\\_gao@imut.edu.cn](mailto:yf_gao@imut.edu.cn) (Y. Gao)

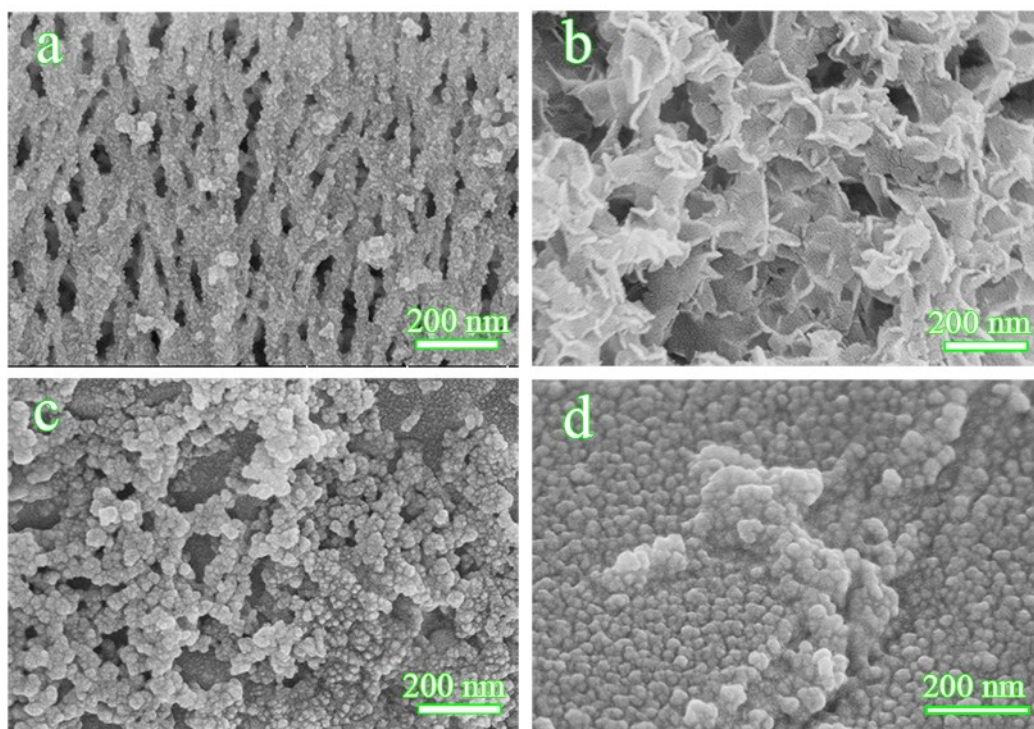

**Fig.S1.** The SEM images of the modified nickel foam under different temperature. (a) At 5 °C; (b) At 30 °C; (c) At 40 °C; (d) At 50 °C.

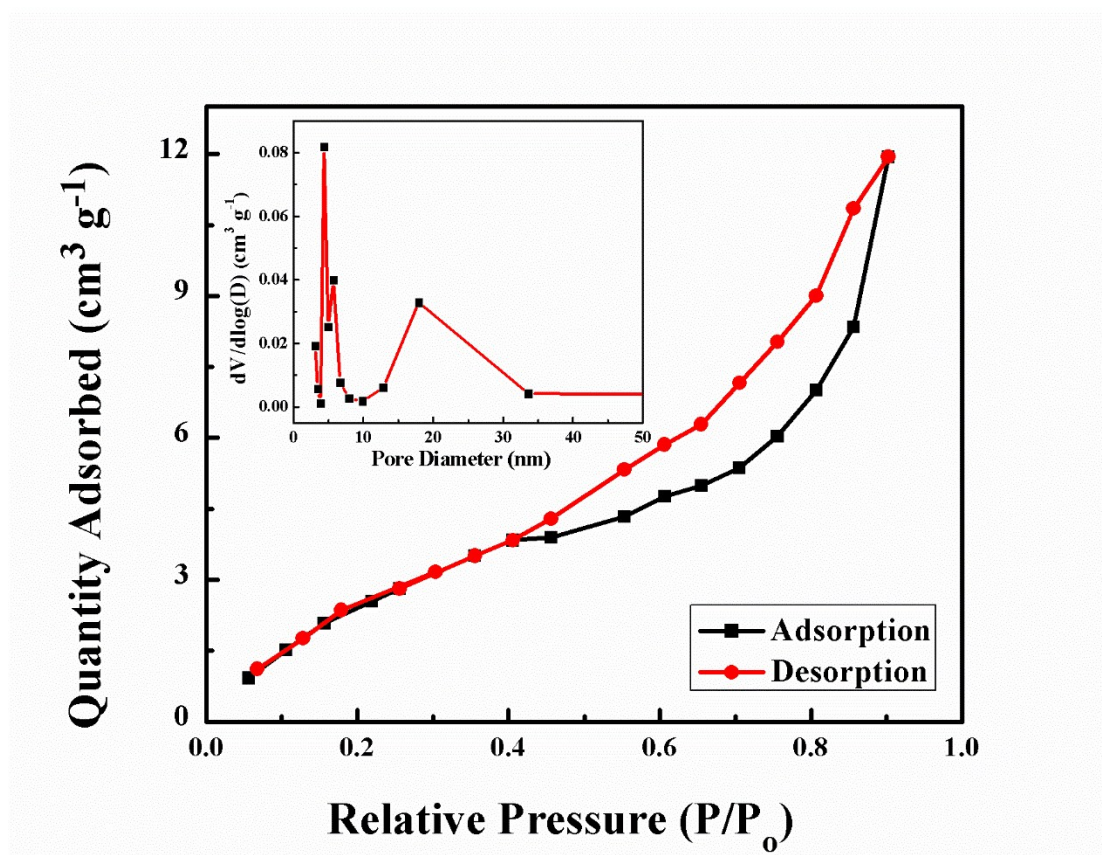

**Fig S2.** Nitrogen adsorption–desorption isotherms and corresponding pore size distribution curves (inset) of the modified nickel foam.
